# Supplementary material for: Genome-Wide Analysis Reveals Changes in Polled Yak Long Non-coding RNAs in Skeletal Muscle Development
Source: Front Genet. 2020 Apr 15;11:365. doi: 10.3389/fgene.2020.00365 (PMC7176074; doi:10.3389/fgene.2020.00365)
Supplement: TABLE S2 — Summary of RNA-seq data and reads mapped to the Bos mutus reference genome. [file Table_2.XLSX]

## Sheet: table s1-1
Sample	raw_reads	raw_bases	clean_reads	clean_bases	valid_bases	Q30	GC
A10	99.28M	14.89G	94.57M	13.86G	0.9307	0.9427	0.4858
A6	98.22M	14.73G	93.56M	13.68G	0.9287	0.9433	0.4893
A7	99.56M	14.93G	94.64M	13.86G	0.9283	0.94	0.4778
E6	98.03M	14.70G	93.46M	13.67G	0.9296	0.942	0.4673
E7	98.27M	14.74G	94.05M	13.77G	0.9345	0.9457	0.4706
E8	99.04M	14.86G	93.91M	13.73G	0.9243	0.9374	0.4761
M2	97.85M	14.68G	95.03M	13.67G	0.9316	0.9491	0.4989
M3	98.12M	14.72G	95.08M	13.78G	0.9364	0.9501	0.489
M4	99.61M	14.94G	96.08M	13.86G	0.9275	0.947	0.5132

## Sheet: table s2-2
	Table S2 Summary of RNA-seq data and reads mapped to the Bos mutus reference genome.
	sample	Min	1st_Qu	Median	Mean	3rd_Qu	Max	SD	Sum
	A10	0	0	0.619	12.335	3.945	11682	159.596	252936
	A6	0	0	0.728	12.121	4.307	9667.34	138.273	248554
	A7	0	0	0.619	11.896	3.902	10170.4	150.842	243937
	E6	0	0.014	1.531	7.756	5.575	1694.81	40.847	159041
	E7	0	0.016	1.609	7.543	5.789	1305.68	36.797	154678
	E8	0	0.016	1.657	8.185	6.001	1649.22	42.488	167840
	M2	0	0	0.705	11.965	5.213	7496.76	103.383	245357
	M3	0	0	0.671	12.066	4.734	7731	114.514	247430
	M4	0	0	0.593	12.815	5.025	10642.4	128.648	262787
